# Supplementary material
Source: publisher site journal article supplement (https://www.jstage.jst.go.jp/article/geochemj/47/3/47_2.0247/_supplement/_download/47_2.0247_1.pdf)
Supplement: Supplementary file 1 [file 47_2.0247_1.pdf]

## Supplementary Materials

**Figure S1. Illustration for typical process of a drinking water treatment plant in Hanam province.**

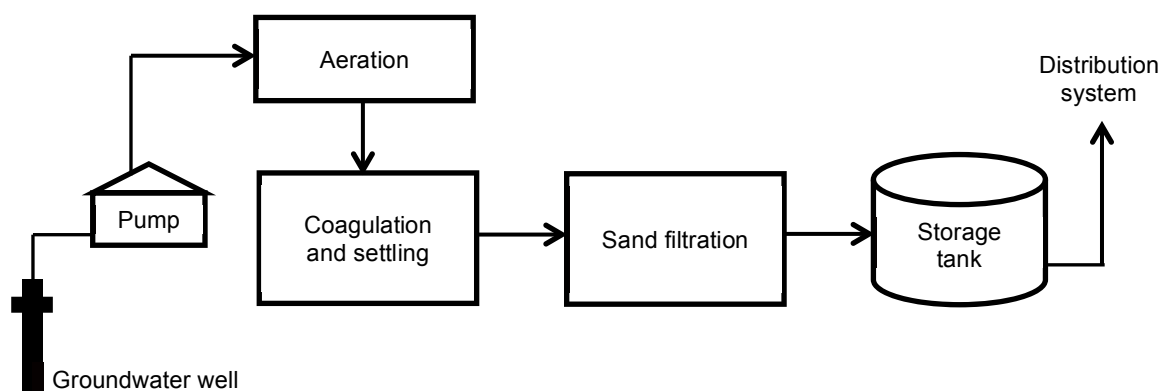

**Table S1. Result of As analysis from all collected water samples (SFW: Sand filtered water; PW: Piped water; SRW: Stored rain water; RGW: Raw groundwater)**

| Household ID            | Type of water | As concentration (µg/L) | Mean As conc. (µg/L) | Range of As conc. (µg/L) |
|-------------------------|---------------|-------------------------|----------------------|--------------------------|
| <b>Nhat Tan commune</b> |               |                         | <b>61.7</b>          | <b>1.34–298</b>          |
| VN01                    | SFW           | 101                     |                      |                          |
| VN04                    | SFW           | 129                     |                      |                          |
| VN06                    | SFW           | 126                     |                      |                          |
| VN07                    | SFW           | 25.2                    |                      |                          |
| VN10                    | SFW           | 7.77                    |                      |                          |
| VN12                    | SFW           | 114                     |                      |                          |
| VN14                    | SFW           | 37.5                    |                      |                          |
| VN16                    | SFW           | 14.2                    |                      |                          |
| VN17                    | SFW           | 15.5                    |                      |                          |
| VN18                    | SFW           | 117                     |                      |                          |
| VN23                    | SFW           | 6.4                     |                      |                          |
| VN26                    | SFW           | 111                     |                      |                          |
| VN30                    | SFW           | 68.3                    |                      |                          |
| VN37                    | SFW           | 1.5                     |                      |                          |
| VN40                    | SFW           | 1.34                    |                      |                          |
| VN42                    | SFW           | 52.8                    |                      |                          |
| VN43                    | SFW           | 41                      |                      |                          |
| VN49                    | SFW           | 298                     |                      |                          |
| VN51                    | SFW           | 219                     |                      |                          |
| VN54                    | SFW           | 151                     |                      |                          |
| VN55                    | SFW           | 103                     |                      |                          |
| VN57                    | SFW           | 1.8                     |                      |                          |
| VN59                    | SFW           | 200                     |                      |                          |
| VN60                    | SFW           | 38.1                    |                      |                          |
| VN02                    | PW            | 42.9                    |                      |                          |

|                          |     |         |             |              |
|--------------------------|-----|---------|-------------|--------------|
| VN03                     | PW  | 49.3    |             |              |
| VN05                     | PW  | 42.2    |             |              |
| VN09                     | PW  | 35.6    |             |              |
| VN11                     | PW  | 47.8    |             |              |
| VN13                     | PW  | 26.3    |             |              |
| VN15                     | PW  | 52.8    |             |              |
| VN19                     | PW  | 46.3    |             |              |
| VN21                     | PW  | 19.4    |             |              |
| VN25                     | PW  | 48.2    |             |              |
| VN27                     | PW  | 55.1    |             |              |
| VN28                     | PW  | 38.6    |             |              |
| VN29                     | PW  | 46.9    |             |              |
| VN31                     | PW  | 43      |             |              |
| VN33                     | PW  | 42.7    |             |              |
| VN34                     | PW  | 52.8    |             |              |
| VN35                     | PW  | 51.5    |             |              |
| VN38                     | PW  | 33.7    |             |              |
| VN41                     | PW  | 39.3    |             |              |
| VN44                     | PW  | 57      |             |              |
| VN45                     | PW  | 121     |             |              |
| VN46                     | PW  | 48.8    |             |              |
| VN47                     | PW  | 92.6    |             |              |
| VN48                     | PW  | 47.2    |             |              |
| VN52                     | PW  | 40.7    |             |              |
| VN53                     | PW  | 41.4    |             |              |
| VN58                     | PW  | 41.9    |             |              |
| VN56                     | SRW | 20.6    |             |              |
| VN08                     | SRW | 6.03    |             |              |
| VN20                     | SRW | 19.9    |             |              |
| VN22                     | SRW | 41      |             |              |
| VN24                     | SRW | 23.7    |             |              |
| VN32                     | SRW | 1.4     |             |              |
| VN36                     | SRW | 93.1    |             |              |
| VN39                     | SRW | 37.3    |             |              |
| VN50                     | SRW | 175     |             |              |
| <b>Hoang Tay commune</b> |     |         | <b>65.7</b> | <b>2-220</b> |
| VH06                     | RGW | 220     |             |              |
| VH18                     | RGW | 97.9    |             |              |
| VH01                     | SFW | 68.5    |             |              |
| VH02                     | SFW | 17.3    |             |              |
| VH03                     | SFW | 23.5    |             |              |
| VH04                     | SFW | 172     |             |              |
| VH05                     | SFW | 20.2    |             |              |
| VH07                     | SFW | 13.6    |             |              |
| VH09                     | SFW | 191     |             |              |
| VH10                     | SFW | 52.4    |             |              |
| VH11                     | SFW | 37.4    |             |              |
| VH12                     | SFW | 37.7    |             |              |
| VH14                     | SFW | 23.6    |             |              |
| VH15                     | SFW | 30      |             |              |
| VH16                     | SFW | 45      |             |              |
| VH17                     | SFW | missing |             |              |

|                       |     |      |             |                  |
|-----------------------|-----|------|-------------|------------------|
| VH20                  | SFW | 22.9 |             |                  |
| VH22                  | SFW | 13.8 |             |                  |
| VH23                  | SFW | 214  |             |                  |
| VH24                  | SFW | 50   |             |                  |
| VH25                  | SFW | 206  |             |                  |
| VH08                  | SRW | 2    |             |                  |
| VH13                  | SRW | 2.3  |             |                  |
| VH19                  | SRW | 11.2 |             |                  |
| VH21                  | SRW | 2.7  |             |                  |
| <b>Van Xa commune</b> |     |      | <b>27.2</b> | <b>0.9–51.6</b>  |
| VV01                  | SFW | 43.1 |             |                  |
| VV02                  | SFW | 46.5 |             |                  |
| VV04                  | SFW | 33.1 |             |                  |
| VV05                  | SFW | 43.6 |             |                  |
| VV06                  | SFW | 11.6 |             |                  |
| VV07                  | SFW | 51.6 |             |                  |
| VV08                  | SFW | 23.9 |             |                  |
| VV09                  | SFW | 24.5 |             |                  |
| VV10                  | SFW | 7.2  |             |                  |
| VV11                  | SFW | 13.6 |             |                  |
| VV03                  | SRW | 0.9  |             |                  |
| <b>Ba Sao commune</b> |     |      | <b>0.59</b> | <b>0.12–1.81</b> |
| VB08                  | RGW | 0.49 |             |                  |
| VB09                  | RGW | 0.38 |             |                  |
| VB10                  | RGW | 0.24 |             |                  |
| VB11                  | RGW | 0.22 |             |                  |
| VB12                  | RGW | 0.4  |             |                  |
| VB13                  | RGW | 1.16 |             |                  |
| VB02                  | RGW | 0.36 |             |                  |
| VB03                  | RGW | 0.74 |             |                  |
| VB04                  | RGW | 0.55 |             |                  |
| VB06                  | RGW | 0.38 |             |                  |
| VB14                  | RGW | 0.35 |             |                  |
| VB16                  | RGW | 0.5  |             |                  |
| VB18                  | RGW | 0.33 |             |                  |
| VB19                  | RGW | 0.31 |             |                  |
| VB21                  | RGW | 0.43 |             |                  |
| VB22                  | RGW | 0.49 |             |                  |
| VB23                  | RGW | 0.15 |             |                  |
| VB24                  | RGW | 0.55 |             |                  |
| VB25                  | RGW | 0.38 |             |                  |
| VB26                  | RGW | 0.6  |             |                  |
| VB27                  | RGW | 0.5  |             |                  |
| VB28                  | RGW | 0.31 |             |                  |
| VB29                  | RGW | 0.37 |             |                  |
| VB31                  | RGW | 0.38 |             |                  |
| VB32                  | RGW | 0.12 |             |                  |
| VB33                  | RGW | 0.21 |             |                  |
| VB35                  | RGW | 0.24 |             |                  |
| VB07                  | SFW | 0.2  |             |                  |
| VB01                  | SRW | 0.9  |             |                  |
| VB05                  | SRW | 1.46 |             |                  |

|                          |     |      |             |                 |
|--------------------------|-----|------|-------------|-----------------|
| VB15                     | SRW | 1.56 |             |                 |
| VB17                     | SRW | 1.5  |             |                 |
| VB20                     | SRW | 1.54 |             |                 |
| VB30                     | SRW | 0.52 |             |                 |
| VB34                     | SRW | 1.81 |             |                 |
| <b>Thi Son commune</b>   |     |      | <b>1.28</b> | <b>0.12–1.3</b> |
| VT01                     | RGW | 1.3  |             |                 |
| VT10                     | RGW | 1.83 |             |                 |
| VT12                     | RGW | 0.64 |             |                 |
| VT16                     | RGW | 1.17 |             |                 |
| VT22                     | RGW | 1.98 |             |                 |
| VT27                     | RGW | 2.1  |             |                 |
| VT29                     | RGW | 0.12 |             |                 |
| VT30                     | RGW | 0.31 |             |                 |
| VT33                     | SFW | 0.12 |             |                 |
| VT02                     | SFW | 0.67 |             |                 |
| VT07                     | SFW | 0.98 |             |                 |
| VT09                     | SFW | 7.8  |             |                 |
| VT13                     | SFW | 1.02 |             |                 |
| VT18                     | SFW | 0.19 |             |                 |
| VT20                     | SFW | 1.11 |             |                 |
| VT26                     | SFW | 0.14 |             |                 |
| VT28                     | SFW | 1.67 |             |                 |
| VT31                     | SFW | 2.84 |             |                 |
| VT34                     | SFW | 0.7  |             |                 |
| VT37                     | SFW | 0.85 |             |                 |
| VT08                     | PW  | 1.56 |             |                 |
| VT11                     | PW  | 1.73 |             |                 |
| VT14                     | PW  | 1.06 |             |                 |
| VT15                     | PW  | 1.42 |             |                 |
| VT17                     | PW  | 1.71 |             |                 |
| VT25                     | PW  | 1.37 |             |                 |
| VT03                     | SRW | 0.12 |             |                 |
| VT04                     | SRW | 1.95 |             |                 |
| VT05                     | SRW | 1.01 |             |                 |
| VT06                     | SRW | 1.06 |             |                 |
| VT19                     | SRW | 1.5  |             |                 |
| VT21                     | SRW | 2.38 |             |                 |
| VT23                     | SRW | 0.13 |             |                 |
| VT24                     | SRW | 1.1  |             |                 |
| VT32                     | SRW | 1.05 |             |                 |
| VT35                     | SRW | 0.71 |             |                 |
| VT36                     | SRW | 0.78 |             |                 |
| <b>Kha Phong commune</b> |     |      | <b>0.6</b>  | <b>0.19–1.4</b> |
| VK01                     | RGW | 0.22 |             |                 |
| VK03                     | RGW | 0.19 |             |                 |
| VK02                     | SRW | 1.4  |             |                 |

**Table S2. As concentration of all types of water samples in three study communes**

|                     | As concentration ( $\mu\text{g/L}$ ) |          | % of sample with As level > 10 $\mu\text{g/L}$ | % of sample with As level > 50 $\mu\text{g/L}$ |
|---------------------|--------------------------------------|----------|------------------------------------------------|------------------------------------------------|
|                     | Mean conc.                           | Range    |                                                |                                                |
| Raw groundwater     | 159                                  | 98–220   | 100                                            | 100                                            |
| Sand filtered water | 67.6                                 | 1.34–298 | 90                                             | 40                                             |
| Piped water         | 48.3                                 | 19.4–121 | 100                                            | 26                                             |
| Stored rainwater    | 31.3                                 | 0.9–175  | 57                                             | 14                                             |

**Table S3. Result of As(III) analysis**

| Household ID     | Type of water | Concentration of As(tot) ( $\mu\text{g/L}$ ) | Concentration of As(III) ( $\mu\text{g/L}$ ) | Mean As(III) conc. ( $\mu\text{g/L}$ ) | Range of As (III) conc. ( $\mu\text{g/L}$ ) |
|------------------|---------------|----------------------------------------------|----------------------------------------------|----------------------------------------|---------------------------------------------|
| <b>Nhat Tan</b>  |               |                                              |                                              | <b>24.4</b>                            | <b>1.18–191</b>                             |
| VN01             | SFW           | 101                                          | 55.3                                         |                                        |                                             |
| VN02             | SFW           | 129                                          | 3                                            |                                        |                                             |
| VN10             | SFW           | 7.8                                          | 2.5                                          |                                        |                                             |
| VN12             | SFW           | 114                                          | 22.3                                         |                                        |                                             |
| VN16             | SFW           | 14.2                                         | 4.3                                          |                                        |                                             |
| VN17             | SFW           | 15.5                                         | 8.4                                          |                                        |                                             |
| VN26             | SFW           | 111                                          | 5.2                                          |                                        |                                             |
| VN30             | SFW           | 68.3                                         | 1.2                                          |                                        |                                             |
| VN51             | SFW           | 219                                          | 15.7                                         |                                        |                                             |
| VN54             | SFW           | 151                                          | 1.9                                          |                                        |                                             |
| VN55             | SFW           | 103                                          | 3.6                                          |                                        |                                             |
| VN60             | SFW           | 38.1                                         | 2.3                                          |                                        |                                             |
| VN59             | SFW           | 200                                          | 191                                          |                                        |                                             |
| VN13             | PW            | 26.3                                         | 9.8                                          |                                        |                                             |
| VN41             | PW            | 39.3                                         | 8.7                                          |                                        |                                             |
| VN45             | PW            | 121                                          | 40.6                                         |                                        |                                             |
| VN39             | SRW           | 37.3                                         | 3.2                                          |                                        |                                             |
| VN50             | SRW           | 175                                          | 70                                           |                                        |                                             |
| VN56             | SRW           | 20.6                                         | 8.8                                          |                                        |                                             |
| <b>Hoang Tay</b> |               |                                              |                                              | <b>71.6</b>                            | <b>0.4–230</b>                              |
| VH18             | RGW           | 97.9                                         | 30.5                                         |                                        |                                             |
| VH06             | RGW           | 220                                          | 152                                          |                                        |                                             |
| VH02             | SFW           | 17.3                                         | 2.7                                          |                                        |                                             |
| VH09             | SFW           | 191                                          | 170                                          |                                        |                                             |
| VH11             | SFW           | 37.4                                         | 2.4                                          |                                        |                                             |

|                |     |      |      |            |                  |
|----------------|-----|------|------|------------|------------------|
| VH03           | SFW | 23.5 | 12.4 |            |                  |
| VH14           | SFW | 23.6 | 2.5  |            |                  |
| VH23           | SFW | 214  | 230  |            |                  |
| VH25           | SFW | 206  | 0.4  |            |                  |
| <b>Van Xa</b>  |     |      |      | <b>3.4</b> | <b>1.28–5.67</b> |
| VV02           | SFW | 46.5 | 2.27 |            |                  |
| VV06           | SFW | 11.6 | 2.57 |            |                  |
| VV08           | SFW | 23.9 | 5.67 |            |                  |
| VV09           | SFW | 24.5 | 5.1  |            |                  |
| VV11           | SFW | 13.6 | 1.28 |            |                  |
| <b>Thi Son</b> |     |      |      | <b>1.3</b> | <b>0.19–2.06</b> |
| VT27           | RGW | 2.07 | 0.19 |            |                  |
| VT09           | SFW | 7.76 | 2.06 |            |                  |
| VT28           | SFW | 1.67 | 1.67 |            |                  |
